# Supplementary material for: Looking at the Expansion of Three Demersal Lessepsian Fish Immigrants in the Greek Seas: What Can We Get from Spatial Distribution Modeling?
Source: MDPI journal article supplement (doi:10.3390/d15060776), 2023-06-15
Supplement: s1 [file s1]

(a)

| Variable            | Percent contribution |
|---------------------|----------------------|
| depth               | 46.2                 |
| posidonia_oceanica  | 21.3                 |
| maximum_chlorophyll | 11.9                 |
| salinity_minimum    | 10.2                 |
| slope               | 6.1                  |
| sst_minimum         | 3.6                  |
| sst_range           | 0.7                  |

(b)

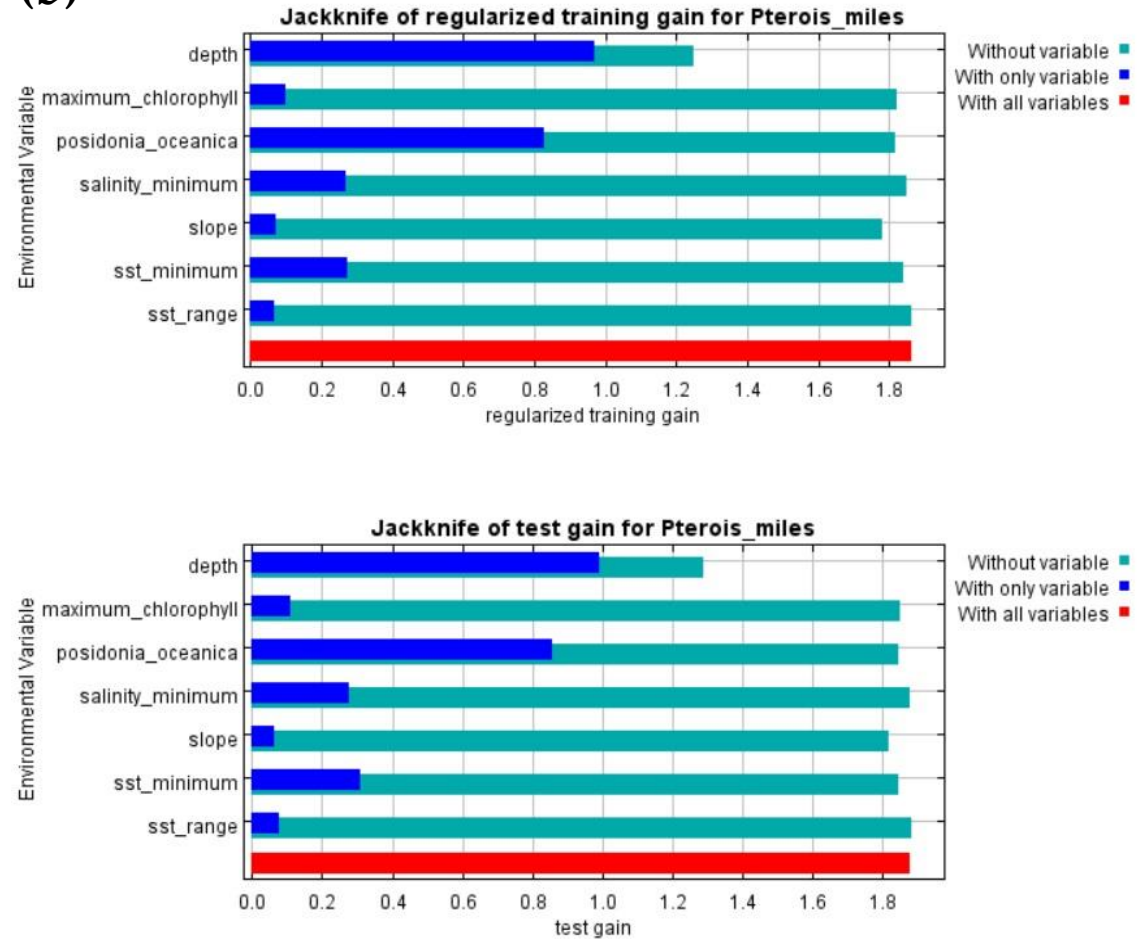

**Figure S1:** The percent contribution (a) and the jackknife table (b) of variable importance for *Pterois miles* for both training and test datasets. The gain of the environmental variables when used in isolation is represented by the blue line while the decrease in the gain when the specific environmental variable is omitted is represented with the green line. Variable explanation: depth = bottom depth (m.); maximum\_chlorophyll = mean maximum sea surface chlorophyll (mg/m<sup>3</sup>); posidonia\_oceanica = model-based distribution of *Posidonia oceanica* meadows (scale 0-4); salinity\_minimum = mean minimum sea surface salinity (psu); slope = bottom slope (degree); sst\_minimum = mean minimum SST (°C); sst\_range = mean annual SST range (°C).

(a)

| Variable            | Percent contribution |
|---------------------|----------------------|
| depth               | 45                   |
| posidonia_oceanica  | 30.9                 |
| maximum_chlorophyll | 9.6                  |
| slope               | 6.4                  |
| sst_minimum         | 5.6                  |
| salinity_minimum    | 1.6                  |
| sst_range           | 0.9                  |

(b)

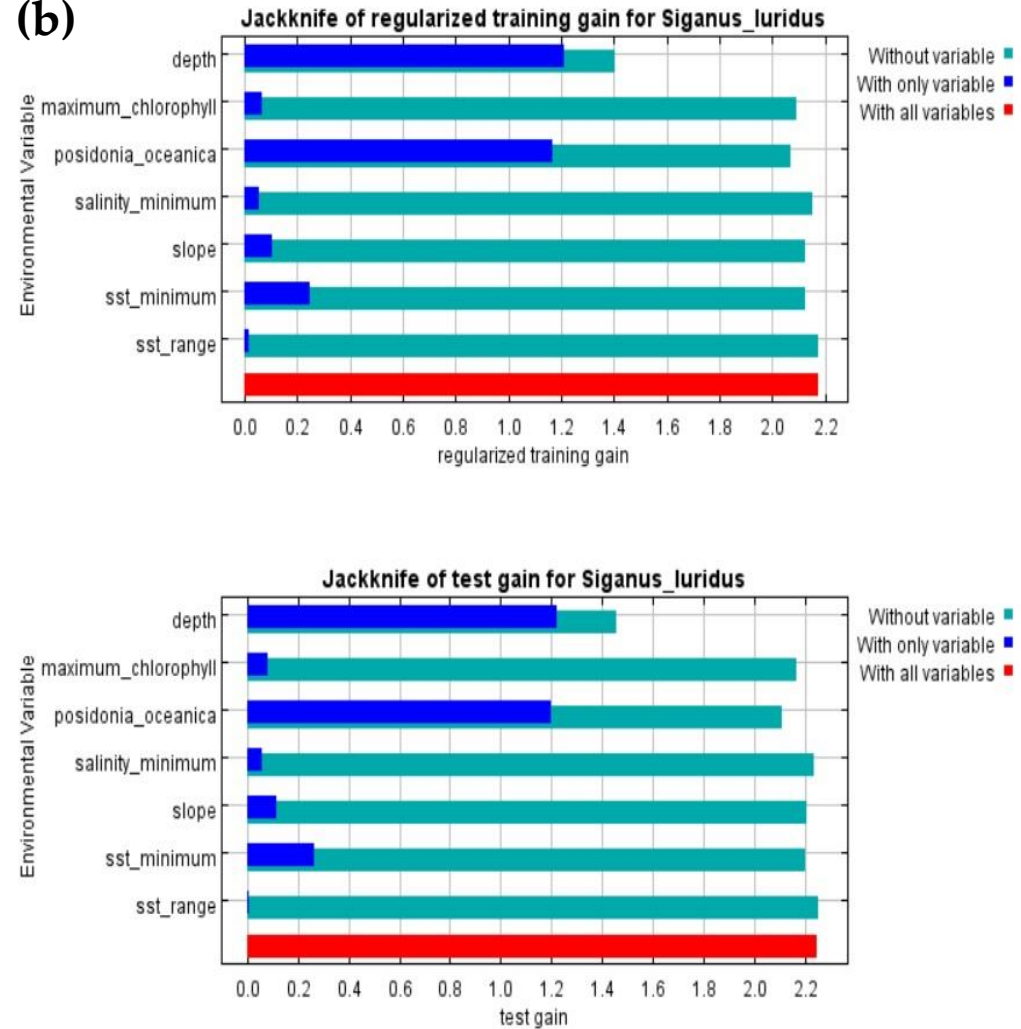

**Figure S2:** The percent contribution (a) and the jackknife table (b) of variable importance for *Siganus luridus* (for both training and test datasets). The gain of the environmental variables when used in isolation is represented by the blue line while the decrease in the gain when the specific environmental variable is omitted is represented with the green line. Variable explanation: depth = bottom depth (m.); maximum\_chlorophyll = mean maximum sea surface chlorophyll (mg/m<sup>3</sup>); posidonia\_oceanica = model-based distribution of *Posidonia oceanica* meadows (scale 0-4); salinity\_minimum = mean minimum sea surface salinity (psu); slope = bottom slope (degree); sst\_minimum = mean minimum SST (°C); sst\_range = mean annual SST range (°C).

(a)

| Variable            | Percent contribution |
|---------------------|----------------------|
| depth               | 43                   |
| posidonia_oceanica  | 37.2                 |
| slope               | 8.3                  |
| maximum_chlorophyll | 7.4                  |
| sst_minimum         | 1.9                  |
| salinity_minimum    | 1.7                  |
| sst_range           | 0.6                  |

(b)

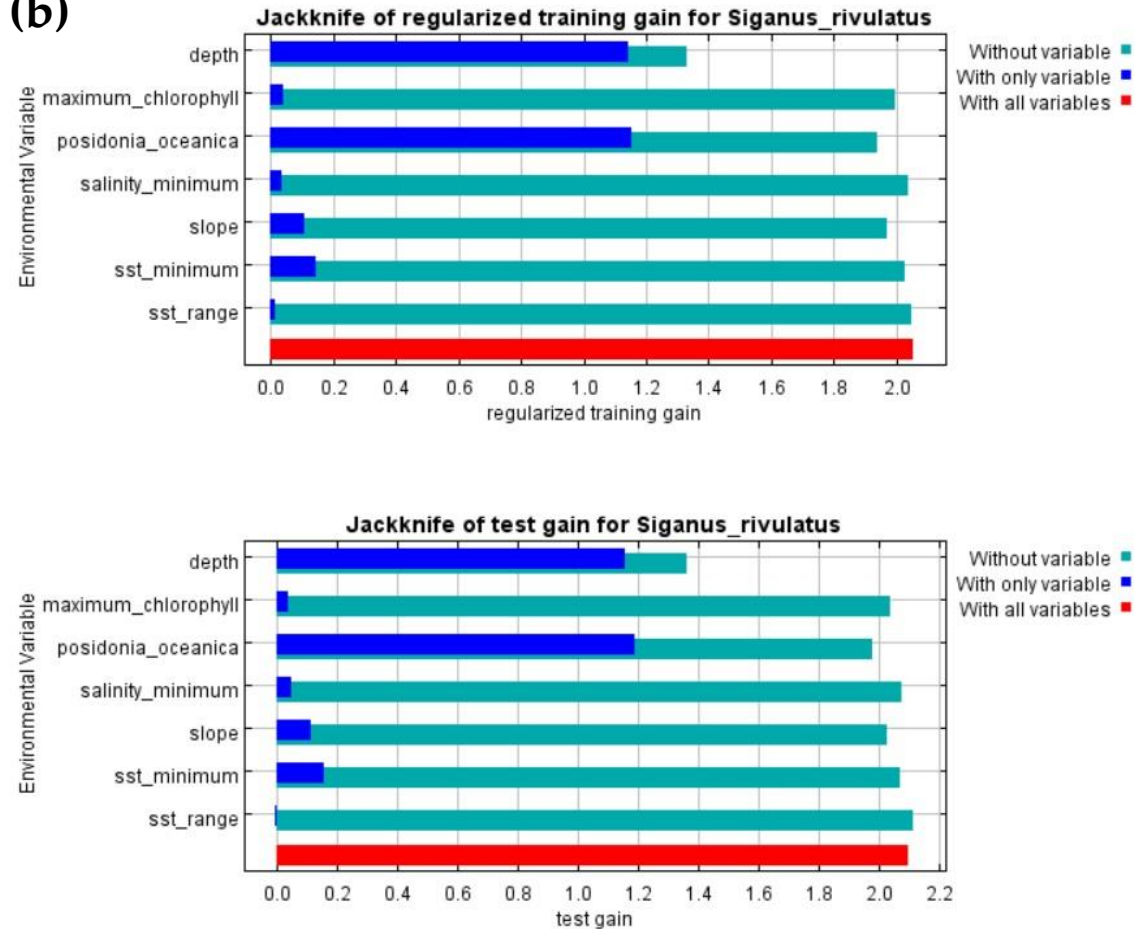

**Figure S3:** The percent contribution (a) and the jackknife table (b) of variable importance for *Siganus rivulatus* (for both training and test datasets). The gain of the environmental variables when used in isolation is represented by the blue line while the decrease in the gain when the specific environmental variable is omitted is represented with the green line. Variable explanation: depth = bottom depth (m.); maximum\_chlorophyll = mean maximum sea surface chlorophyll (mg/m<sup>3</sup>); posidonia\_oceanica = model-based distribution of *Posidonia oceanica* meadows (scale 0-4); salinity\_minimum = mean minimum sea surface salinity (psu); slope = bottom slope (degree); sst\_minimum = mean minimum SST (°C); sst\_range = mean annual SST range (°C).
